# Supplementary figures and images for: Mechanistic Insights of Anti-Immune Evasion by Nobiletin through Regulating miR-197/STAT3/PD-L1 Signaling in Non-Small Cell Lung Cancer (NSCLC) Cells
Source: MDPI journal article supplement (doi:10.3390/ijms22189843), 2021-09-11

Figure S1

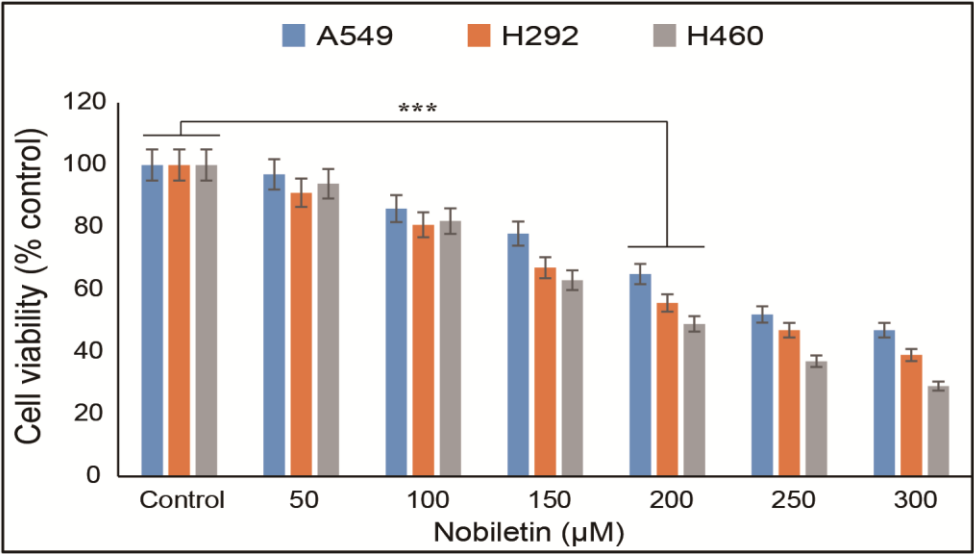

**Figure S2**

**A**

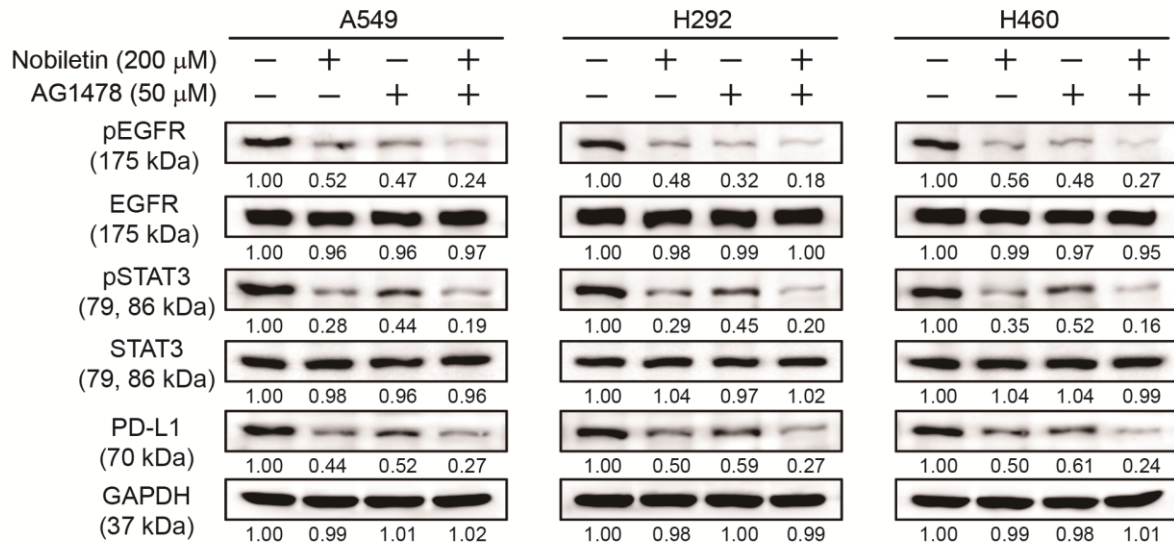

**B**

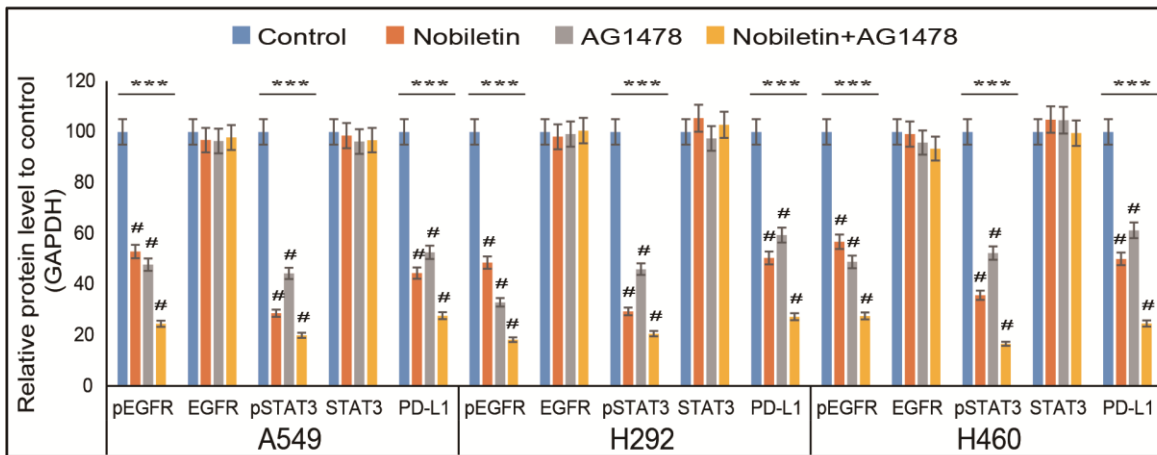

**Figure S3**

**A**

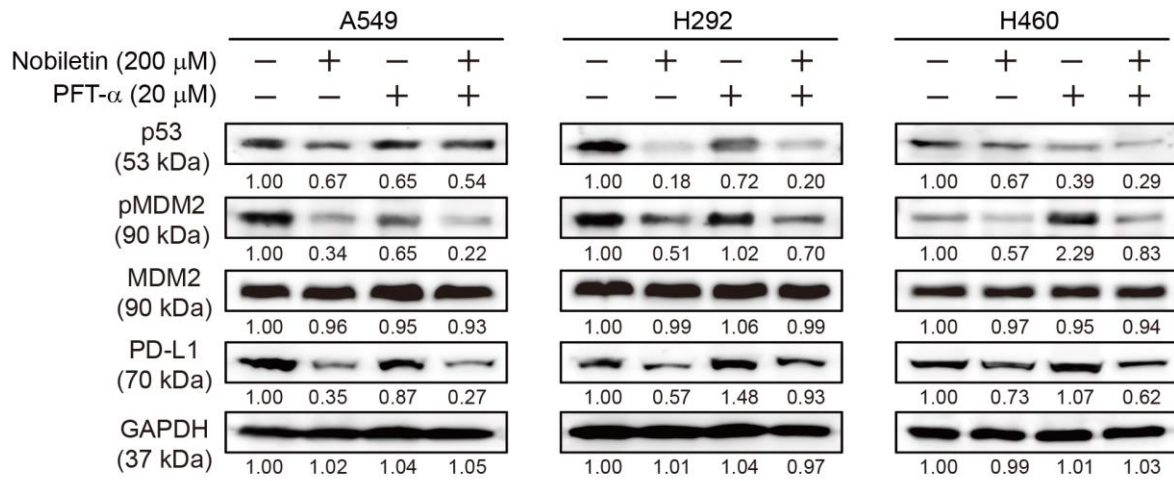

**B**

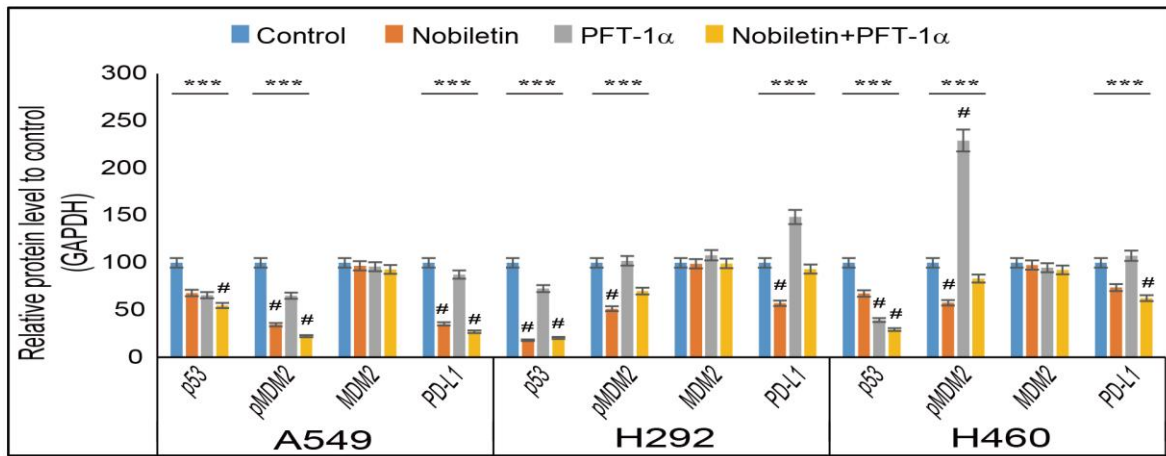

**Figure S4**

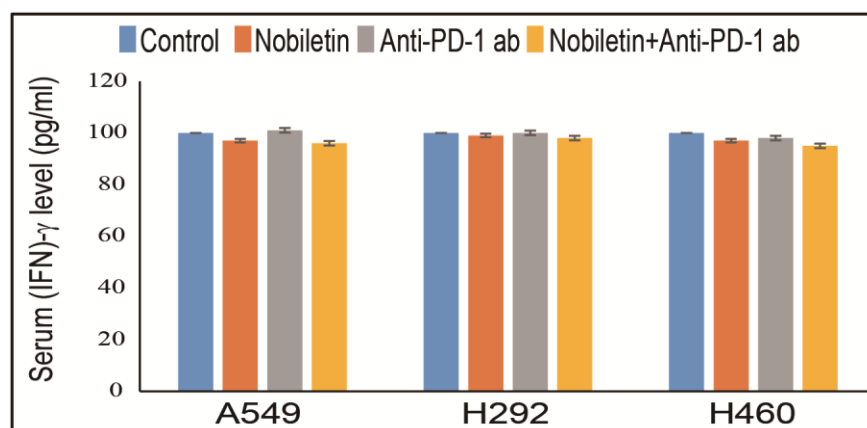

Supplement: s1 [file s1]
